# Supplementary material for: Pre-dialysis care trajectory and post-dialysis survival and transplantation access in patients with end-stage kidney disease
Source: Springer Nature journal article supplement (doi:10.1007/s40620-023-01711-y), 2023-07-28
Supplement: MOESM1 [file 40620_2023_1711_MOESM1_ESM.pdf]

## Supplemental Material

Supplemental Table 1: Socio-demographic characteristics (data before imputation) of patients who started dialysis in France in 2015 in function of the dialysis initiation (planned or in emergency) and vascular access (with fistula or catheter).

Supplemental Table 2: Clinical and biological characteristics (data before imputation) of patients who started dialysis in France in 2015 in function of the dialysis initiation (planned or in emergency) and vascular access (with fistula or catheter).

Supplemental Table 3: Comorbidities (data before imputation) of patients who started dialysis in France in 2015 in function of the dialysis initiation (planned or in emergency) and vascular access (with fistula or catheter).

Supplemental Table 4: Dialysis characteristics (data before imputation) of patients who started dialysis in France in 2015 in function of the dialysis initiation (planned or in emergency) and vascular access (with fistula or catheter).

Supplemental Table 5: Healthcare consumption (data before imputation) of patients who started dialysis in France in 2015 in function of the dialysis initiation (planned or in emergency) and vascular access (with fistula or catheter).

**Supplemental Table 1: Socio-demographic characteristics (data before imputation) of patients who started dialysis in France in 2015 in function of the dialysis initiation (planned or in emergency) and vascular access (with fistula or catheter).**

| Variable                | Dialysis initiation and vascular access |                                       |                                          |                                        | Missing<br>(N = 503) | p-value<br>(Chi2 test) |
|-------------------------|-----------------------------------------|---------------------------------------|------------------------------------------|----------------------------------------|----------------------|------------------------|
|                         | Planned with<br>catheter<br>(N = 2206)  | Planned with<br>fistula<br>(N = 3514) | Emergency with<br>catheter<br>(N = 2255) | Emergency with<br>fistula<br>(N = 378) |                      |                        |
| <b>Sex</b>              |                                         |                                       |                                          |                                        |                      | <b>&lt;0.001</b>       |
| <b>Women</b>            | 857 (39%)                               | 1208 (34%)                            | 785 (35%)                                | 115 (30%)                              | 196                  |                        |
| <b>Men</b>              | 1349 (61%)                              | 2306 (66%)                            | 1470 (65%)                               | 263 (70%)                              | 307                  |                        |
| <b>Age</b>              |                                         |                                       |                                          |                                        |                      | <b>&lt;0.001</b>       |
| <b>18 - 45 years</b>    | 147 (6%)                                | 286 (8%)                              | 221 (9%)                                 | 25 (7%)                                | 57                   |                        |
| <b>45 - 60 years</b>    | 329 (15%)                               | 604 (17%)                             | 333 (15%)                                | 61 (16%)                               | 61                   |                        |
| <b>60 - 75 years</b>    | 747 (34%)                               | 1305 (37%)                            | 809 (36%)                                | 133 (35%)                              | 164                  |                        |
| <b>&gt;75 years</b>     | 983 (45%)                               | 1319 (38%)                            | 892 (40%)                                | 159 (42%)                              | 221                  |                        |
| <b>BMI</b>              |                                         |                                       |                                          |                                        |                      | <b>&lt;0.001</b>       |
| <b>23-24</b>            | 296 (14%)                               | 466 (13%)                             | 262 (12%)                                | 47 (12%)                               | 81                   |                        |
| <b>&lt;18.5</b>         | 84 (4%)                                 | 54 (2%)                               | 81 (4%)                                  | 11 (3%)                                | 13                   |                        |
| <b>18.5 - 22</b>        | 464 (21%)                               | 622 (18%)                             | 526 (23%)                                | 72 (19%)                               | 1008                 |                        |
| <b>25 - 29</b>          | 529 (24%)                               | 1072 (30%)                            | 527 (23%)                                | 101 (27%)                              | 140                  |                        |
| <b>≥30</b>              | 425 (19%)                               | 841 (24%)                             | 387 (17%)                                | 86 (23%)                               | 80                   |                        |
| <b>Missing</b>          | 408 (18%)                               | 459 (13%)                             | 472 (21%)                                | 61 (16%)                               | 81                   |                        |
| <b>Employment</b>       |                                         |                                       |                                          |                                        |                      | <b>0.002</b>           |
| <b>Not active</b>       | 1811 (82%)                              | 2781 (88%)                            | 1818 (90%)                               | 308 (81%)                              | 398                  |                        |
| <b>Active</b>           | 174 (8%)                                | 382 (12%)                             | 210 (10%)                                | 33 (9%)                                | 58                   |                        |
| <b>Missing</b>          | 221 (10%)                               | 351 (10%)                             | 227 (10%)                                | 37 (10%)                               | 47                   |                        |
| <b>Tobacco</b>          |                                         |                                       |                                          |                                        |                      | <b>0.04</b>            |
| <b>Smoker/Ex-smoker</b> | 767 (35%)                               | 1,260 (36%)                           | 814 (36%)                                | 164 (43%)                              | 201                  |                        |

|                   |            |            |            |           |     |
|-------------------|------------|------------|------------|-----------|-----|
| <b>Non-smoker</b> | 1023 (46%) | 1715 (49%) | 1063 (47%) | 166 (44%) | 220 |
| <b>Missing</b>    | 416 (19%)  | 539 (15%)  | 378 (17%)  | 48 (13%)  | 82  |

BMI, Body Mass Index; Values are expressed as N (%); The Chi2 test don't take into account of missing values

**Supplemental Table 2: Clinical and biological characteristics (data before imputation) of patients who started dialysis in France in 2015 in function of the dialysis initiation (planned or in emergency) and vascular access (with fistula or catheter).**

| Variable                           | Dialysis initiation and vascular access |                                       |                                          |                                        | Missing<br>(N = 503) | p-value<br>(Chi2 test) |
|------------------------------------|-----------------------------------------|---------------------------------------|------------------------------------------|----------------------------------------|----------------------|------------------------|
|                                    | Planned with<br>catheter<br>(N = 2206)  | Planned with<br>fistula<br>(N = 3514) | Emergency with<br>catheter<br>(N = 2255) | Emergency with<br>fistula<br>(N = 378) |                      |                        |
| <b>Nephropathy type</b>            |                                         |                                       |                                          |                                        |                      | <b>&lt;0.001</b>       |
| Acute                              | 334 (15%)                               | 273 (7.8%)                            | 383 (17%)                                | 36 (9.5%)                              | 50                   |                        |
| Chronic                            | 1439 (65%)                              | 2604 (74%)                            | 1357 (60%)                               | 251 (66%)                              | 312                  |                        |
| Unknown                            | 433 (20%)                               | 637 (18%)                             | 515 (23%)                                | 91 (24%)                               | 141                  |                        |
| <b>Albuminemia</b>                 |                                         |                                       |                                          |                                        |                      | <b>&lt;0.001</b>       |
| <30 g/L                            | 473 (21%)                               | 344 (10%)                             | 609 (27%)                                | 76 (20%)                               | 55                   |                        |
| ≥30 g/L                            | 1478 (67%)                              | 2713 (77%)                            | 1314 (58%)                               | 249 (66%)                              | 375                  |                        |
| Missing                            | 255 (12%)                               | 457 (13%)                             | 332 (15%)                                | 53 (14%)                               | 73                   |                        |
| <b>eGFR</b>                        |                                         |                                       |                                          |                                        |                      | <b>&lt;0.001</b>       |
| 5 – 9 mL/min/1.73 m <sup>2</sup>   | 1079 (49%)                              | 1917 (55%)                            | 937 (42%)                                | 172 (46%)                              | 211                  |                        |
| <5 mL/min/1.73 m <sup>2</sup>      | 331 (15%)                               | 282 (8%)                              | 501 (22%)                                | 66 (17%)                               | 36                   |                        |
| 10 – 14 mL/min/1.73 m <sup>2</sup> | 431 (19%)                               | 796 (23%)                             | 350 (15%)                                | 76 (20%)                               | 128                  |                        |
| 15 – 19 mL/min/1.73 m <sup>2</sup> | 104 (5%)                                | 125 (4%)                              | 102 (5%)                                 | 16 (4%)                                | 27                   |                        |
| ≥20 mL/min/1.73 m <sup>2</sup>     | 73 (3%)                                 | 65 (1%)                               | 109 (5%)                                 | 13 (4%)                                | 42                   |                        |
| Missing                            | 188 (9%)                                | 329 (9%)                              | 256 (11%)                                | 35 (9%)                                | 59                   |                        |
| <b>Hemoglobin</b>                  |                                         |                                       |                                          |                                        |                      | <b>&lt;0.001</b>       |
| <10 g/dL                           | 1329 (60%)                              | 1563 (45%)                            | 1505 (67%)                               | 212 (56%)                              | 151                  |                        |

|                           |            |            |            |           |                  |
|---------------------------|------------|------------|------------|-----------|------------------|
| <b>10 – 11 g/dL</b>       | 577 (26%)  | 1247 (35%) | 472 (21%)  | 101 (27%) | 200              |
| <b>≥12 g/dL</b>           | 221 (10%)  | 599 (17%)  | 175 (8%)   | 47 (12%)  | 126              |
| <b>Missing</b>            | 79 (4%)    | 105 (3%)   | 103 (4%)   | 18 (5%)   | 26               |
| <b>Mobility</b>           |            |            |            |           | <b>&lt;0.001</b> |
| <b>Total incapacity</b>   | 115 (5%)   | 58 (2%)    | 163 (7%)   | 21 (5%)   | 22               |
| <b>Needs help</b>         | 305 (14%)  | 220 (6%)   | 335 (15%)  | 48 (13%)  | 55               |
| <b>Autonomous walking</b> | 1613 (73%) | 2988 (85%) | 1551 (69%) | 256 (68%) | 388              |
| <b>Missing</b>            | 173 (8%)   | 248 (7%)   | 206 (9%)   | 53 (14%)  | 38               |

eGFR, estimated glomerular filtration rate; Values are expressed as N (%); The Chi2 test don't take into account of missing values

**Supplemental Table 3: Comorbidities (data before imputation) of patients who started dialysis in France in 2015 in function of the dialysis initiation (planned or in emergency) and vascular access (with fistula or catheter).**

| Variable             | Dialysis initiation and vascular access |                                       |                                          |                                        | Missing<br>(N = 503) | p-value<br>(Chi2 test) |
|----------------------|-----------------------------------------|---------------------------------------|------------------------------------------|----------------------------------------|----------------------|------------------------|
|                      | Planned with<br>catheter<br>(N = 2206)  | Planned with<br>fistula<br>(N = 3514) | Emergency with<br>catheter<br>(N = 2255) | Emergency with<br>fistula<br>(N = 378) |                      |                        |
| <b>Cirrhosis</b>     |                                         |                                       |                                          |                                        |                      | 0.3                    |
| <b>No</b>            | 2093 (95%)                              | 3351 (95%)                            | 2121 (94%)                               | 354 (94%)                              | 477                  |                        |
| <b>Yes</b>           | 58 (3%)                                 | 77 (2%)                               | 66 (3%)                                  | 12 (3%)                                | 17                   |                        |
| <b>Missing</b>       | 55 (2%)                                 | 86 (3%)                               | 68 (3%)                                  | 12 (3%)                                | 9                    |                        |
| <b>Active cancer</b> |                                         |                                       |                                          |                                        |                      | <b>&lt;0.001</b>       |
| <b>No</b>            | 1875 (85%)                              | 3167 (90%)                            | 1878 (83%)                               | 323 (5%)                               | 452                  |                        |
| <b>Yes</b>           | 276 (12%)                               | 272 (8%)                              | 312 (14%)                                | 41 (11%)                               | 41                   |                        |
| <b>Missing</b>       | 55 (3%)                                 | 75 (2%)                               | 65 (3%)                                  | 14 (4%)                                | 10                   |                        |
| <b>Diabetes</b>      |                                         |                                       |                                          |                                        |                      | <b>0.006</b>           |
| <b>No</b>            | 1185 (54%)                              | 1959 (56%)                            | 1208 (54%)                               | 181 (48%)                              | 297                  |                        |
| <b>Yes</b>           | 1007 (46%)                              | 1542 (44%)                            | 1038 (46%)                               | 196 (52%)                              | 203                  |                        |

|                                          |            |            |            |           |     |                  |
|------------------------------------------|------------|------------|------------|-----------|-----|------------------|
| <b>Missing</b>                           | 14 (0%)    | 13 (0%)    | 9 (0%)     | 1 (0%)    | 3   |                  |
| <b>Chronic respiratory disease</b>       |            |            |            |           |     | <b>&lt;0.001</b> |
| <b>No</b>                                | 1802 (82%) | 2891 (82%) | 1763 (78%) | 285 (75%) | 410 |                  |
| <b>Yes</b>                               | 324 (15%)  | 521 (15%)  | 407 (18%)  | 79 (21%)  | 81  |                  |
| <b>Missing</b>                           | 80 (3%)    | 102 (3%)   | 85 (4%)    | 14 (4%)   | 12  |                  |
| <b>Number of cardiovascular diseases</b> |            |            |            |           |     | <b>&lt;0.001</b> |
| <b>0</b>                                 | 952 (43%)  | 1746 (50%) | 861 (38%)  | 138 (37%) | 205 |                  |
| <b>1</b>                                 | 517 (23%)  | 811 (23%)  | 502 (22%)  | 88 (23%)  | 92  |                  |
| <b>2</b>                                 | 362 (16%)  | 479 (14%)  | 395 (18%)  | 67 (18%)  | 81  |                  |
| <b>≥3</b>                                | 375 (17%)  | 478 (14%)  | 497 (22%)  | 85 (22%)  | 125 |                  |
| <b>Disability</b>                        |            |            |            |           |     | <b>0.002</b>     |
| <b>No</b>                                | 2038 (92%) | 3337 (95%) | 2099 (93%) | 355 (94%) | 472 |                  |
| <b>Yes</b>                               | 168 (8%)   | 177 (5%)   | 156 (7%)   | 23 (6%)   | 31  |                  |
| <b>Behavioral disorder</b>               |            |            |            |           |     | <b>0.03</b>      |
| <b>No</b>                                | 1933 (88%) | 3202 (91%) | 1963 (87%) | 327 (87%) | 457 |                  |
| <b>Yes</b>                               | 85 (4%)    | 85 (2%)    | 67 (3%)    | 13 (3%)   | 16  |                  |
| <b>Missing</b>                           | 188 (8%)   | 227 (6%)   | 225 (10%)  | 38 (10%)  | 30  |                  |

Values are expressed as N (%); The Chi2 test don't take into account of missing values

**Supplemental Table 4: Dialysis characteristics (data before imputation) of patients who started dialysis in France in 2015 in function of the dialysis initiation (planned or in emergency) and vascular access (with fistula or catheter).**

| Variable | Dialysis initiation and vascular access |                                       |                                          |                                        | Missing<br>(N = 503) | p-value<br>(Chi2 test) |
|----------|-----------------------------------------|---------------------------------------|------------------------------------------|----------------------------------------|----------------------|------------------------|
|          | Planned with<br>catheter<br>(N = 2206)  | Planned with<br>fistula<br>(N = 3514) | Emergency with<br>catheter<br>(N = 2255) | Emergency with<br>fistula<br>(N = 378) |                      |                        |

|                             |            |            |            |           |     |                  |
|-----------------------------|------------|------------|------------|-----------|-----|------------------|
| <b>Dialysis modality</b>    |            |            |            |           |     | <b>&lt;0.001</b> |
| Peritoneal dialysis         | 71 (3%)    | 283 (8%)   | 13 (1%)    | 14 (4%)   | 431 |                  |
| Hemodialysis                | 2135 (97%) | 3231 (92%) | 2242 (99%) | 364 (96%) | 72  |                  |
| <b>Stand-alone dialysis</b> |            |            |            |           |     | <b>&lt;0.001</b> |
| No                          | 2137 (97%) | 3025 (86%) | 2227 (99%) | 358 (95%) | 250 |                  |
| Yes                         | 64 (3%)    | 483 (14%)  | 28 (1%)    | 20 (5%)   | 240 |                  |
| Missing                     | 5 (0%)     | 6 (0%)     | 0 (0%)     | 0 (0%)    | 13  |                  |
| <b>Vascular approach</b>    |            |            |            |           |     | <b>&lt;0.001</b> |
| Arteriovenous fistula       | 182 (8%)   | 3002 (86%) | 170 (7%)   | 310 (82%) | 48  |                  |
| Catheter                    | 1732 (79%) | 120 (3%)   | 1763 (78%) | 38 (10%)  | 19  |                  |
| Bypass surgery              | 15 (1%)    | 87 (3%)    | 13 (1%)    | 9 (2%)    | 0   |                  |
| Other                       | 202 (9%)   | 13 (0%)    | 292 (13%)  | 6 (2%)    | 3   |                  |
| Missing                     | 75 (3%)    | 292 (8%)   | 17 (1%)    | 15 (4%)   | 433 |                  |

Values are expressed as N (%); The Chi2 test don't take into account of missing values

**Supplemental Table 5: Healthcare consumption (data before imputation) of patients who started dialysis in France in 2015 in function of the dialysis initiation (planned or in emergency) and vascular access (with fistula or catheter).**

| Variable                                                                      | Dialysis initiation and vascular access |                                       |                                          |                                        | Missing<br>(N = 503) | p-value<br>(Chi2 test) |
|-------------------------------------------------------------------------------|-----------------------------------------|---------------------------------------|------------------------------------------|----------------------------------------|----------------------|------------------------|
|                                                                               | Planned with<br>catheter<br>(N = 2206)  | Planned with<br>fistula<br>(N = 3514) | Emergency with<br>catheter<br>(N = 2255) | Emergency with<br>fistula<br>(N = 378) |                      |                        |
| <b>Number of visits to a general practitioner in the year before dialysis</b> |                                         |                                       |                                          |                                        |                      | <b>&lt;0.001</b>       |
| [1-7]                                                                         | 868 (39%)                               | 1620 (46%)                            | 982 (44%)                                | 135 (36%)                              | 233                  |                        |

|                                                                                          |            |            |            |           |                  |
|------------------------------------------------------------------------------------------|------------|------------|------------|-----------|------------------|
| 0                                                                                        | 148 (7%)   | 195 (6%)   | 208 (9%)   | 30 (8%)   | 38               |
| ≥8                                                                                       | 1190 (54%) | 1699 (48%) | 1065 (47%) | 213 (56%) | 232              |
| <b>Number of visits to a nephrologist in the penultimate semester before dialysis</b>    |            |            |            |           | <b>&lt;0.001</b> |
| 1                                                                                        | 463 (21%)  | 729 (21%)  | 370 (16%)  | 80 (21%)  | 107              |
| 0                                                                                        | 1153 (52%) | 896 (25%)  | 1417 (63%) | 150 (40%) | 183              |
| 2                                                                                        | 321 (15%)  | 889 (25%)  | 283 (13%)  | 91 (24%)  | 103              |
| >2                                                                                       | 269 (12%)  | 1000 (28%) | 185 (8%)   | 57 (15%)  | 110              |
| <b>Number of visits to a nephrologist in the final semester before dialysis</b>          |            |            |            |           | <b>&lt;0.001</b> |
| 1                                                                                        | 410 (19%)  | 402 (11%)  | 374 (17%)  | 70 (19%)  | 78               |
| 0                                                                                        | 761 (34%)  | 436 (12%)  | 1186 (53%) | 86 (23%)  | 106              |
| 2                                                                                        | 385 (17%)  | 705 (20%)  | 326 (14%)  | 88 (23%)  | 84               |
| >2                                                                                       | 650 (29%)  | 1971 (56%) | 369 (16%)  | 134 (35%) | 235              |
| <b>Number of creatinine measurements in the year before dialysis</b>                     |            |            |            |           | <b>&lt;0.001</b> |
| [1-12]                                                                                   | 896 (41%)  | 1478 (42%) | 736 (33%)  | 133 (35%) | 210              |
| 0                                                                                        | 478 (22%)  | 303 (8.6%) | 801 (36%)  | 59 (16%)  | 46               |
| ≥13                                                                                      | 832 (38%)  | 1733 (49%) | 718 (32%)  | 186 (49%) | 247              |
| <b>Number of hospital stays for ≥24h for kidney problems in the year before dialysis</b> |            |            |            |           | <b>&lt;0.001</b> |
| 0                                                                                        | 823 (37%)  | 1636 (47%) | 1031 (46%) | 145 (38%) | 182              |
| 1                                                                                        | 475 (22%)  | 742 (21%)  | 400 (18%)  | 64 (17%)  | 118              |
| ≥2                                                                                       | 908 (41%)  | 1136 (32%) | 824 (37%)  | 169 (45%) | 203              |
| <b>Number of hospital stays for ≥24h for other problems in the year before dialysis</b>  |            |            |            |           | <b>&lt;0.001</b> |
| 0                                                                                        | 1633 (74%) | 2888 (82%) | 1614 (72%) | 307 (81%) | 400              |
| 1                                                                                        | 315 (14%)  | 412 (12%)  | 327 (15%)  | 49 (13%)  | 55               |
| ≥2                                                                                       | 258 (12%)  | 214 (6%)   | 314 (14%)  | 22 (6%)   | 48               |

|                                                                                     |            |            |            |           |     |                  |
|-------------------------------------------------------------------------------------|------------|------------|------------|-----------|-----|------------------|
| <b>Number of hospital stays to prepare for dialysis in the year before dialysis</b> |            |            |            |           |     | <b>&lt;0.001</b> |
| <b>0</b>                                                                            | 1590 (72%) | 1310 (37%) | 1906 (85%) | 173 (46%) | 171 |                  |
| <b>≥1</b>                                                                           | 616 (28%)  | 2204 (63%) | 349 (15%)  | 205 (54%) | 332 |                  |
| <b>Number of ambulatory stays in the year before dialysis</b>                       |            |            |            |           |     | <b>&lt;0.001</b> |
| <b>0</b>                                                                            | 1471 (67%) | 2166 (62%) | 1550 (69%) | 248 (66%) | 278 |                  |
| <b>1</b>                                                                            | 394 (18%)  | 739 (21%)  | 401 (18%)  | 79 (21%)  | 107 |                  |
| <b>≥2</b>                                                                           | 341 (15%)  | 609 (17%)  | 304 (13%)  | 51 (13%)  | 118 |                  |

Values are expressed as N (%); The Chi2 test don't take into account of missing value
